# Supplementary material for: Improving Familial Hypercholesterolemia Index Case Detection: Sequential Active Screening from Centralized Analytical Data
Source: MDPI journal article supplement (doi:10.3390/jcm10040749), 2021-02-13
Supplement: s1 [file s1]

## SUPPLEMENTARY MATERIAL

**Table S1: Dutch Lipid Clinic Network criteria**

|                                                                                                                                                            | Points |
|------------------------------------------------------------------------------------------------------------------------------------------------------------|--------|
| <b>Family history</b>                                                                                                                                      |        |
| First-degree relative with premature ASCVD<br>OR<br>First-degree relative with LDL-C $\geq$ 210 mg/dl                                                      | 1<br>1 |
| First-degree relative with corneal arcus and/or tendon xanthoma<br>OR<br>Children < 18 years with LDL-C $\geq$ 150 mg/dl                                   | 2<br>2 |
| <b>Clinical history</b>                                                                                                                                    |        |
| Patient with premature coronary artery disease                                                                                                             | 2      |
| Patient with premature cerebral or peripheral vascular disease                                                                                             | 1      |
| <b>Physical examination</b>                                                                                                                                |        |
| Tendon xanthoma                                                                                                                                            | 6      |
| Corneal arcus < 45 years                                                                                                                                   | 4      |
| <b>Analytical results</b>                                                                                                                                  |        |
| LDL-C $\geq$ 330 mg/dl                                                                                                                                     | 8      |
| LDL-C $\geq$ 250 - 329 mg/dl                                                                                                                               | 5      |
| LDL-C $\geq$ 190 - 249 mg/dl                                                                                                                               | 3      |
| LDL-C $\geq$ 155 - 189 mg/dl                                                                                                                               | 1      |
| <b>Genetic testing</b>                                                                                                                                     |        |
| Causative mutation in the <i>LDLR</i> , <i>APOB</i> or <i>PCSK9</i> genes                                                                                  | 8      |
| <b>FH definite: <math>\geq</math> 8 points      Probable FH: 6-7 points</b><br><b>FH possible: 3-5 points      Unlikely FH: <math>\leq</math> 2 points</b> |        |



**Table S2: Causative mutations in DLCN  $\geq 6$  group**

|                                          |           |
|------------------------------------------|-----------|
| <b>Positive genetic study</b>            | 57 (100)  |
| • <b><i>LDLR</i> gene</b>                | 53 (92.9) |
| • <b><i>APOB</i> gene</b>                | 3 (5.3)   |
| • <b><i>APOE</i> gene</b>                | 1 (1.8)   |
| • <b><i>LDLR</i> or <i>APOB</i> gene</b> | 56 (98.2) |

**Table S3: Genetic variants in DLCN  $\geq 6$  group**

| Patient | Sex    | Age | DLCN | Genetic variant                                | Variant classification |
|---------|--------|-----|------|------------------------------------------------|------------------------|
| 1       | Female | 35  | 12   | <i>LDLR</i> c.1342C>T p.(Gln427*)              | Pathogenic             |
| 2       | Male   | 69  | 6    | <i>LDLR</i> c.1342C>T p.(Gln427*)              | Pathogenic             |
| 3       | Female | 49  | 10   | <i>LDLR</i> c.1898G>A, p.(Arg612His)           | Pathogenic             |
| 4       | Female | 56  | 9    | <i>LDLR</i> c.1238C>T, p.(Thr413Met)           | Likely pathogenic      |
| 5       | Female | 60  | 6    | <i>LDLR</i> c.622G>A, p.(Glu208Lys)            | Likely pathogenic      |
| 6       | Male   | 47  | 9    | <i>LDLR</i> c.126C>A, p.(Tyr42*)               | Pathogenic             |
| 7       | Female | 34  | 9    | <i>LDLR</i> c.1261A>G, p.(Ser421Gly)           | Likely pathogenic      |
| 8       | Male   | 40  | 11   | <i>LDLR</i> c.1587-2A>G, p.(?)                 | Pathogenic             |
| 9       | Male   | 29  | 9    | <i>LDLR</i> c.676T>C, p.(Ser226Pro)            | Pathogenic             |
| 10      | Female | 83  | 9    | <i>LDLR</i> c.1054T>C, p.(Cys352Arg)           | Likely pathogenic      |
| 11      | Female | 27  | 6    | <i>LDLR</i> c.313+1G>C, p.(?)                  | Pathogenic             |
| 12      | Female | 50  | 9    | <i>LDLR</i> c.313+1G>C, p.(?)                  | Pathogenic             |
| 13      | Female | 35  | 6    | <i>LDLR</i> c.1775G>A, p.(Gly592Glu)           | Pathogenic             |
| 14      | Male   | 75  | 8    | <i>LDLR</i> c.1925T>C, p.(Leu642Ser)           | Likely pathogenic      |
| 15      | Female | 59  | 9    | <i>LDLR</i> c.1342C>T, p.(Gln448*)             | Pathogenic             |
| 16      | Female | 32  | 6    | <i>LDLR</i> c.1342C>T, p.(Gln448*)             | Pathogenic             |
| 17      | Female | 53  | 6    | <i>LDLR</i> c.2546C>A, p.(Ser849*)             | Pathogenic             |
| 18      | Female | 34  | 6    | <i>LDLR</i> c.967G>A, p.(Gly323Ser)            | Likely pathogenic      |
| 19      | Female | 36  | 9    | <i>LDLR</i> c.47T>C, p.(Leu16Pro)              | Likely pathogenic      |
| 20      | Female | 30  | 7    | <i>LDLR</i> c.1444G>A, p.(Asp482Asn)           | Likely pathogenic      |
| 21      | Male   | 49  | 6    | <i>APOB</i> c.13151T>C, p.(Leu4384Pro)         | Likely pathogenic      |
| 22      | Female | 66  | 6    | <i>LDLR</i> c.1246C>T, p.(Arg416Trp)           | Pathogenic             |
| 23      | Female | 47  | 7    | <i>LDLR</i> c.1981C>A, p.(Pro661Thr)           | Likely pathogenic      |
| 24      | Female | 43  | 7    | <i>LDLR</i> c.1981C>A, p.(Pro661Thr)           | Likely pathogenic      |
| 25      | Male   | 32  | 9    | <i>LDLR</i> c.1342C>T, p.(Gln448*)             | Pathogenic             |
| 26      | Female | 51  | 6    | <i>LDLR</i> c.1054T>C, p.(Cys352Arg)           | Likely pathogenic      |
| 27      | Female | 65  | 6    | <i>LDLR</i> c.1246C>T, p.(Arg416Trp)           | Pathogenic             |
| 28      | Male   | 55  | 7    | <i>LDLR</i> c.530C>T, p.(Ser177Leu),           | Pathogenic             |
| 29      | Male   | 46  | 7    | <i>LDLR</i> c.2099A>G, p.(Asp700Gly)           | Likely pathogenic      |
| 30      | Female | 48  | 6    | <i>LDLR</i> c.593C>A, p.(Ser198*)              | Pathogenic             |
| 31      | Female | 25  | 6    | <i>LDLR</i> c.337G>A, p.(Glu113Lys)            | Likely pathogenic      |
| 32      | Female | 53  | 7    | <i>APOE</i> c.500_502del, p.(Leu167del)        | Pathogenic             |
| 33      | Male   | 34  | 11   | <i>LDLR</i> c.1055_1060+5del, p.(?)            | Pathogenic             |
| 34      | Female | 61  | 9    | <i>LDLR</i> c.2275_2302del, p.(Thr761Lysfs*18) | Pathogenic             |
| 35      | Male   | 32  | 6    | <i>LDLR</i> c.2275_2302del, p.(Thr761Lysfs*18) | Pathogenic             |
| 36      | Male   | 33  | 6    | <i>LDLR</i> c.1618G>A, p.(Ala540Thr)           | Likely pathogenic      |
| 37      | Male   | 41  | 6    | <i>LDLR</i> c.1618G>A, p.(Ala540Thr)           | Likely pathogenic      |

|    |        |    |    |                                            |                   |
|----|--------|----|----|--------------------------------------------|-------------------|
| 38 | Male   | 56 | 6  | <i>LDLR</i> c.1216C>T, p.(Arg406Trp)       | Likely pathogenic |
| 39 | Male   | 58 | 7  | <i>LDLR</i> c.2099A>G, p.(Asp700Gly)       | Likely pathogenic |
| 40 | Female | 37 | 7  | <i>LDLR</i> c.2099A>G, p.(Asp700Gly)       | Likely pathogenic |
| 41 | Male   | 37 | 10 | <i>LDLR</i> c.1342C>T, p.(Gln448*),        | Pathogenic        |
| 42 | Male   | 47 | 6  | <i>LDLR</i> c.1216C>T, p.(Arg406Trp)       | Likely pathogenic |
| 43 | Female | 38 | 9  | <i>LDLR</i> c.1434del, p.(Leu479Trpfs*28)  | Pathogenic        |
| 44 | Female | 35 | 6  | <i>LDLR</i> c.81C>G, p.(Cys27Trp)          | Pathogenic        |
| 45 | Female | 58 | 6  | <i>APOB</i> c.10580G>A, p.(Arg3527Gln)     | Pathogenic        |
| 46 | Female | 53 | 6  | <i>APOB</i> c.13151T>C, p.(Leu4384Pro)     | Likely pathogenic |
| 47 | Female | 31 | 11 | <i>LDLR</i> c.1342C>T, p.(Gln448*)         | Pathogenic        |
| 48 | Female | 57 | 6  | <i>LDLR</i> c.1342C>T, p.(Gln448*)         | Pathogenic        |
| 49 | Male   | 56 | 7  | <i>LDLR</i> c.1618G>A, p.(Ala540Thr)       | Likely pathogenic |
| 50 | Male   | 37 | 10 | <i>LDLR</i> c.313+1G>C                     | Pathogenic        |
| 51 | Male   | 27 | 6  | <i>LDLR</i> c.1601C>A, p.(Thr534Asn)       | Likely pathogenic |
| 52 | Male   | 45 | 11 | <i>LDLR</i> c.1775G>A, p.(Gly592Glu)       | Pathogenic        |
| 53 | Female | 49 | 6  | <i>LDLR</i> c.530C>T, p.(Ser177Leu)        | Pathogenic        |
| 54 | Female | 45 | 9  | <i>LDLR</i> c.2140+1G>T                    | Pathogenic        |
| 55 | Male   | 36 | 13 | <i>LDLR</i> c.1342C>T, p.(Gln448*)         | Pathogenic        |
| 56 | Female | 39 | 9  | <i>LDLR</i> c.313+1G>C                     | Pathogenic        |
| 57 | Female | 42 | 13 | <i>LDLR</i> c.1061-? 1586+?del             | Pathogenic        |
| 58 | Male   | 46 | 5  | <i>LDLR</i> c.2475C>A, p.(Asn825Lys)       | Pathogenic        |
| 59 | Female | 55 | 4  | <i>APOB</i> c.6639_6641del, p.(Asp2213del) | Likely pathogenic |
